# Supplementary material for: The Effect of the Mixed Extract of Kalopanax pictus Nakai and Achyranthes japonica Nakai on the Improvement of Degenerative Osteoarthritis through Inflammation Inhibition in the Monosodium Iodoacetate-Induced Mouse Model
Source: MDPI journal article supplement (doi:10.3390/cimb45080404), 2023-08-01
Supplement: s1 [file s1]

**Table S1.** Anti-body used in Western blot experiments.

| <b>Antibody</b> | <b>Source</b> | <b>Cat. No.</b> | <b>Manufacturer</b> |
|-----------------|---------------|-----------------|---------------------|
| ERK             | Rabbit        | #9102S          | Cell Signaling      |
| p-ERK           | Rabbit        | #9101S          | Cell Signaling      |
| JNK             | Rabbit        | #9252S          | Cell Signaling      |
| p-JNK           | Rabbit        | #4671S          | Cell Signaling      |
| p38             | Rabbit        | #9212S          | Cell Signaling      |
| p-p38           | Rabbit        | #4511S          | Cell Signaling      |
| NF-kB           | Rabbit        | #8242S          | Cell Signaling      |
| p-NF-kB         | Rabbit        | #3033S          | Cell Signaling      |
| iNOS            | Rabbit        | ab178945        | Abcam               |
| $\beta$ -actin  | Mouse         | sc-47778        | Santa Cruze         |
| anti-Rb-HRP     | Mouse         | sc-2357         | Santa Cruze         |
| anti-ms-HRP     | Goat          | sc-516102       | Santa Cruze         |

As a result of analyzing inflammatory cytokines and MMPs in the culture of LPS-induced RAW 264.7 using ELISA kit, it was confirmed that the expression of TNF- $\alpha$ , IL-6, PGE2, MMP-2 and MMP-9 was significantly increased in the LPS treatment group.

In the case of the SHP-47B treatment group, TNF- $\alpha$ , IL-6, PGE2, MMP-2 and MMP-9 were inhibited in a concentration-dependent manner, and in the MMP-2 result, the results were similar to those of the control group from the SHP-47B 500  $\mu$ g/mL concentration. showed

Through these results, it was thought that SHP-47 would be able to derive significant results in subsequent arthritic animal experiments.

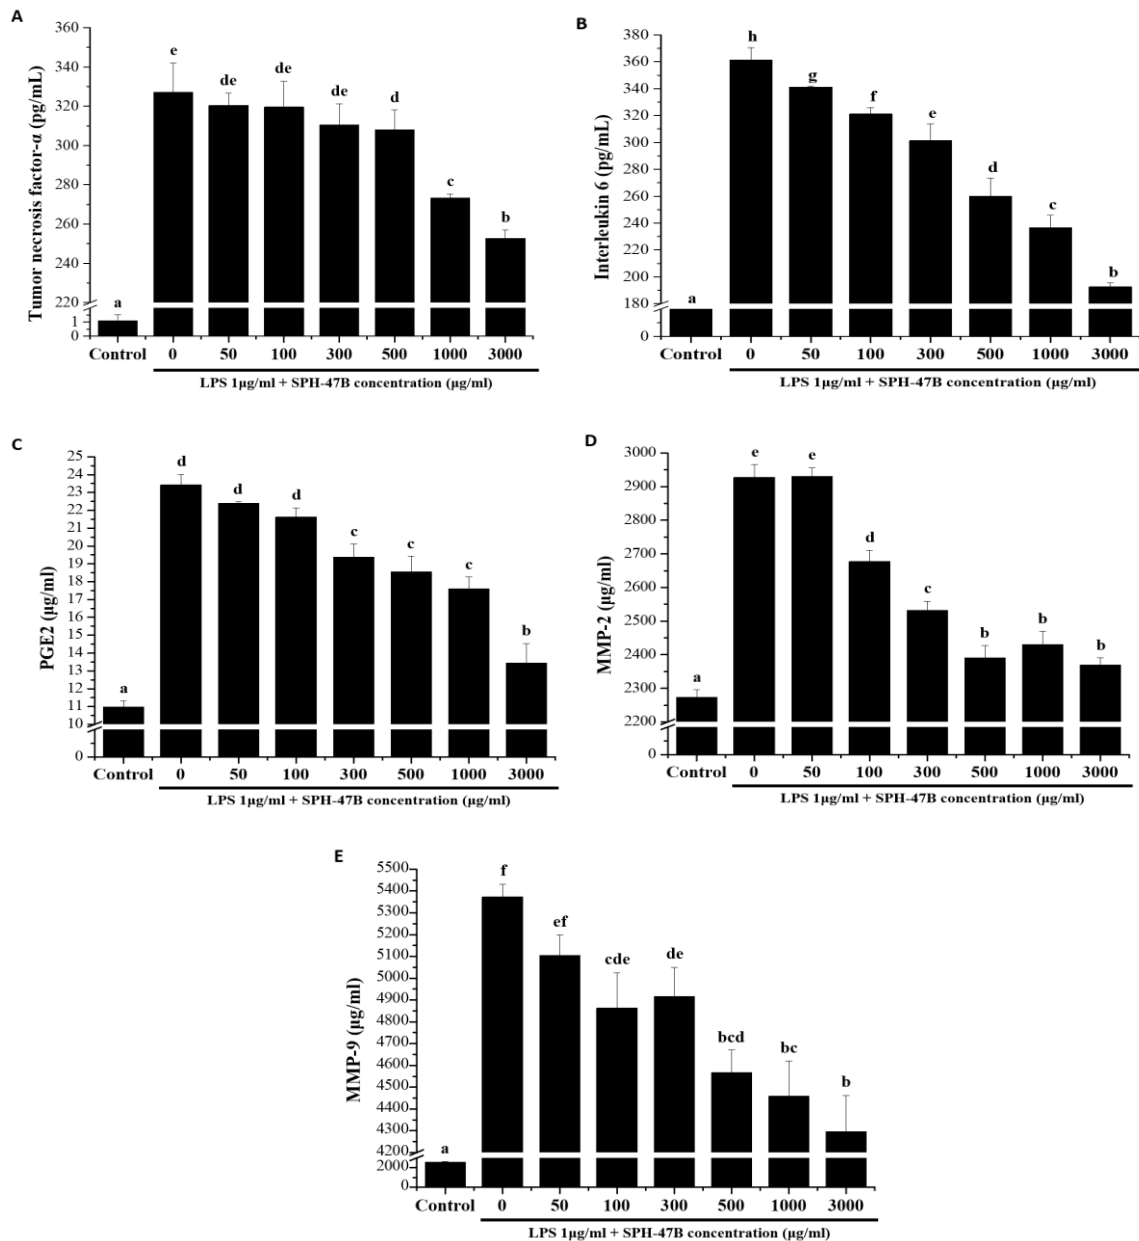

**Figure S1.** Effect of SHP-47 treatment on hematological analysis, (A) tumor necrosis factor- $\alpha$  (TNF- $\alpha$ ), (B) interleukin-6 (IL-6), (C) prostaglandin E2 (PGE2), (D) matrix metalloproteinase-2 (MMP-2) and (E) matrix metalloproteinase-9 (MMP-9) in a mice model of arthritis induced by MIA. The data are expressed as the mean  $\pm$  SD (n = 7), and different letters (h>g>f>e>d > c > b > a) indicate a significant difference at  $p < 0.05$ , as determined by Duncan's multiple-range test.

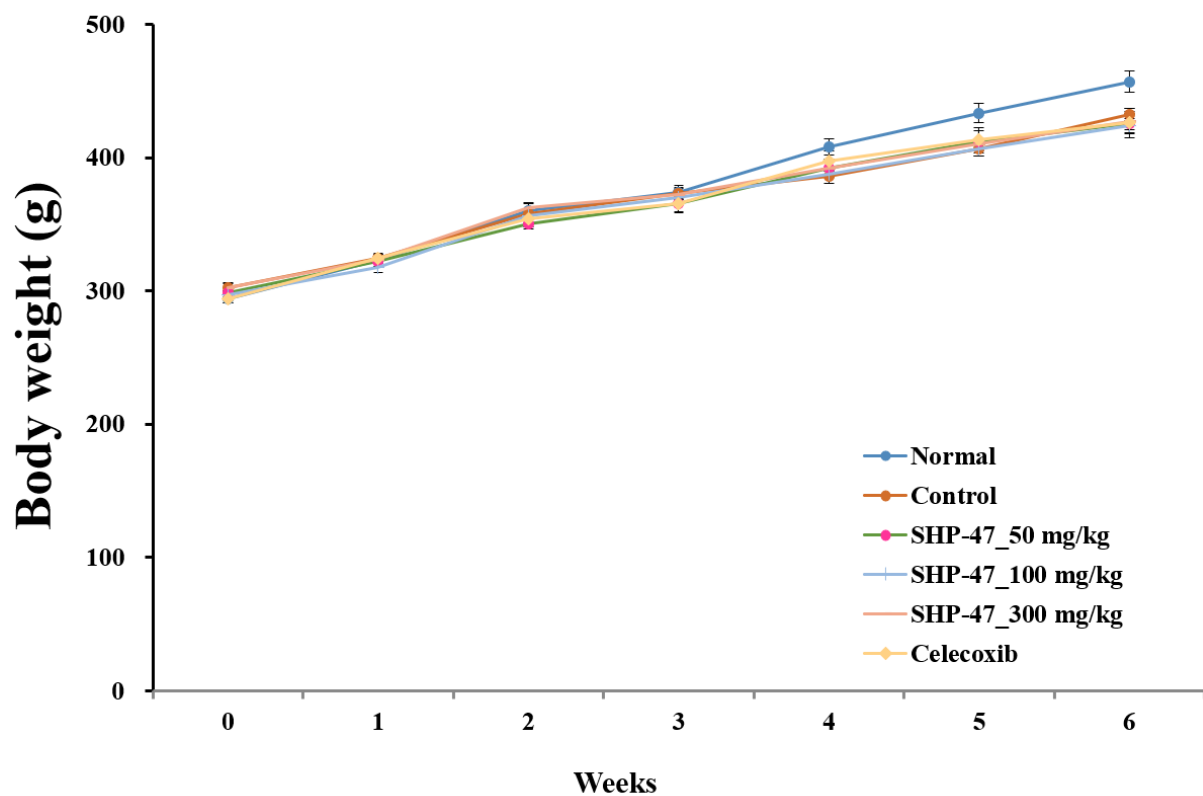

**Figure S2.** Effects of SHP-47 treatment on weight of mice in MIA-induced Arthritis mice models. N : Normal, C : Control, L : SHP-47 50 mg/kg, M : SHP-47 100 mg/kg, H : SHP-47 300 mg/kg, P : celecoxib. The data are expressed as the mean  $\pm$  SD (n = 7), and different letters (b > a) indicate a significant difference at  $p < 0.05$ , as determined by Duncan's multiple-range test.
